# Supplementary material for: Prevalence of alcohol related attendance at an inner city emergency department and its impact: a dual prospective and retrospective cohort study
Source: PubMed Central journal article supplement — Emerg Med J. 2015 Mar 23;33(3):187–93. doi: 10.1136/emermed-2014-204581 (PMC4789717; doi:10.1136/emermed-2014-204581), 2015-03-23
Supplement: emermed-2014-204581-s1.pdf [file emermed-2014-204581-s1.pdf]

**Table S1: Multiple logistic regression of positive BrAC test on predictor variables and interaction term (age group \* time of day)**

|                          |                           | Odds Ratio | Standard Error | z     | P>z   | 95% Confidence Interval |
|--------------------------|---------------------------|------------|----------------|-------|-------|-------------------------|
| <b>Gender</b>            | Male                      | 1.00       |                |       |       |                         |
|                          | Female                    | 0.56       | 0.07           | -4.76 | <0.01 | 0.44-0.71               |
| <b>Age group (years)</b> | 65 and over               | 1.00       |                |       |       |                         |
|                          | 45-64                     | 3.55       | 2.78           | 1.62  | 0.11  | 0.76-16.51              |
|                          | 25-44                     | 4.47       | 3.40           | 1.97  | 0.05  | 1.00-19.86              |
|                          | 18-24                     | 9.80       | 7.44           | 3.01  | <0.01 | 2.21-43.40              |
| <b>Time of day</b>       | 06.00-11.59               | 1.00       |                |       |       |                         |
|                          | Noon-17.59                | 1.28       | 1.18           | 0.27  | 0.79  | 0.21-7.77               |
|                          | 18.00-23.59               | 10.48      | 8.14           | 3.02  | <0.01 | 2.28-48.04              |
|                          | Midnight-05.59            | 3.13       | 3.18           | 1.12  | 0.26  | 0.43-22.93              |
| <b>Age * Time of day</b> | 65 and over * 06.00-11.59 | 1.00       |                |       |       |                         |
|                          | 45-64 * noon-17.59        | 0.71       | 0.73           | -0.34 | 0.74  | 0.09-5.31               |
|                          | 45-64 * 18.00-23.59       | 0.71       | 0.61           | -0.40 | 0.69  | 0.13-3.85               |
|                          | 45-64 * midnight-05.59    | 3.89       | 4.25           | 1.24  | 0.21  | 0.46-33.14              |
|                          | 25-44 * noon-17.59        | 1.12       | 1.09           | 0.11  | 0.91  | 0.16-7.62               |
|                          | 25-44 * 18.00-23.59       | 0.49       | 0.41           | -0.86 | 0.39  | 0.09-2.50               |
|                          | 25-44 * midnight-05.59    | 6.00       | 6.39           | 1.69  | 0.09  | 0.75-48.28              |
|                          | 18-24 * noon-17.59        | 0.26       | 0.26           | -1.34 | 0.18  | 0.04-1.85               |
|                          | 18-24 * 18.00-23.59       | 0.11       | 0.09           | -2.65 | 0.01  | 0.02-0.55               |
|                          | 18-24 * midnight-05.59    | 5.92       | 6.28           | 1.68  | 0.09  | 0.74-47.34              |
| <b>Day of week</b>       | Monday                    | 1.00       |                |       |       |                         |
|                          | Tuesday                   | 1.46       | 0.38           | 1.49  | 0.14  | 0.89-2.42               |
|                          | Wednesday                 | 1.62       | 0.41           | 1.93  | 0.05  | 0.99-2.65               |
|                          | Thursday                  | 1.38       | 0.36           | 1.24  | 0.22  | 0.83-2.29               |
|                          | Friday                    | 2.50       | 0.65           | 3.54  | <0.01 | 1.50-4.15               |
|                          | Saturday                  | 3.53       | 0.84           | 5.29  | <0.01 | 2.21-5.64               |
|                          | Sunday                    | 3.21       | 0.75           | 4.95  | <0.01 | 2.02-5.09               |
| <b>Area</b>              | NE postcode               | 1.00       |                |       |       |                         |
|                          | Other                     | 1.85       | 0.38           | 3.01  | <0.01 | 1.24-2.77               |

BrAC: Breath alcohol concentration
